# Supplementary material for: All-Cause Standardized Mortality Ratio in Hemodialysis and Peritoneal Dialysis Patients: A Nationwide Population-Based Cohort Study
Source: MDPI journal article supplement (doi:10.3390/ijerph20032347), 2023-01-28
Supplement: s1 [file s1]

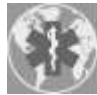

## Supplementary Materials

**Table S1.** International Classification of Diseases Code.

| Causes of death                                             | ICD-9-CM                              | ICD-10-CM                                                              |
|-------------------------------------------------------------|---------------------------------------|------------------------------------------------------------------------|
| Infectious and parasitic diseases                           | 001-139                               | A00-B99                                                                |
| Neoplasms                                                   | 140-239                               | C00-D49                                                                |
| Malignant neoplasm of lip, oral cavity, and pharynx         | 140-149                               | C00-C14                                                                |
| Malignancy of digestive organs and peritoneum               | 150-159                               | C15-C26                                                                |
| Malignancy of respiratory and intrathoracic organs          | 160-165                               | C30-C39                                                                |
| Malignancy of bone, connective tissue, skin, and breast     | 170-176                               | C40-C41, C43-C44, C45-C49, C50                                         |
| Malignancy of urinary organs                                | 185-189                               | C64-C68                                                                |
| Malignancy of lymphatic and hematopoietic tissue            | 200-209                               | C81-C96                                                                |
| Other and unspecified sites                                 | 170-184, 190-199, 210-239             | C51-C58, C60-63, C69-C72, C73-C75, C76-C80, C97, D00-D48               |
| Endocrine, nutritional, metabolic, and immunity disorders   | 240-279                               | E00-E89                                                                |
| Diabetes mellitus                                           | 249-250                               | E10-E14                                                                |
| Disorders of thyroid gland                                  | 240-246, 251-259                      | E00-E07, E15-E16, E20-E35                                              |
| Disorders of other endocrine glands                         | 260-279                               | E40-E46, E50-E64, E65-E68, E70-E89                                     |
| Blood and blood-forming organs                              | 280-289                               | D50-D89                                                                |
| Mental disorders                                            | 290-319                               | F01-F99                                                                |
| Nervous system and sense organs                             | 320-389                               | G00-G99, H00-H95                                                       |
| Circulatory system                                          | 390-459                               | I00-I99                                                                |
| Hypertensive disease                                        | 401-405                               | I10-I16                                                                |
| Ischemic heart disease                                      | 410-414                               | I20-I25                                                                |
| Other forms of heart disease                                | 420-429                               | I30-I52                                                                |
| Cerebrovascular disease                                     | 430-438                               | I60-I69                                                                |
| Diseases of arteries, arterioles, and capillaries           | 440-449                               | I70-I79                                                                |
| Other diseases of circulatory system                        | 390-398, 415-417, 451-459             | I00-I02, I05-I09, I26-I28, I80-I89, I95-I99                            |
| Respiratory system                                          | 460-519                               | J00-J99                                                                |
| Pneumonia and influenza                                     | 480-488                               | J09-J18                                                                |
| Chronic obstructive pulmonary disease and allied conditions | 490-496                               | J40-J47                                                                |
| Other diseases of respiratory system                        | 460-466, 470-478, 500-508, 510-519    | J00-J06, J20-J22, J30-J39, J60-J70, J80-J84, J85-J86, J90-J94, J95-J99 |
| Digestive system                                            | 520-579                               | K00-K95                                                                |
| Diseases of esophagus, stomach, and duodenum                | 530-539                               | K20-K31                                                                |
| Diseases of intestines                                      | 555-558, 560, 562, 564, 565, 566, 569 | K50-K52, K55-K64                                                       |
| Diseases of peritoneum and retroperitoneum                  | 567-568                               | K65-K68                                                                |

|                                                                                       |                                    |                                    |
|---------------------------------------------------------------------------------------|------------------------------------|------------------------------------|
| Diseases of liver                                                                     | 570-573                            | K70-K77                            |
| Disorders of gallbladder, biliary tract, and pancreas                                 | 574-577                            | K80-K87                            |
| Other diseases of digestive system                                                    | 520-529, 540-543, 550-553, 578-579 | K00-K14, K35-K38, K40-K46, K90-K95 |
| Genitourinary system                                                                  | 580-629                            | N00-N99                            |
| Nephritis, nephrotic syndrome, and nephrosis                                          | 580-589                            | N00-N08, N10-16, N17-N19           |
| Other diseases of urinary system                                                      | 590-599                            | N20-N23, N25-N29, N30-N39, N99     |
| Disorders of genital organ                                                            | 600-608, 610-612, 614-616, 617-629 | N40-N51, N60-N64, N70-N77, N80-N98 |
| Skin and subcutaneous tissue                                                          | 680-709                            | L00-L99                            |
| Musculoskeletal system and connective tissue                                          | 710-739                            | M00-M99                            |
| Congenital anomalies                                                                  | 740-759                            | Q00-Q99                            |
| Symptoms, signs, and ill-defined conditions                                           | 780-799                            | R00-R99                            |
| Accident                                                                              | E800-929                           | V00-V99, W00-W99, X00-X58          |
| Suicide and self-inflicted injury                                                     | E950-959                           | X71-X83                            |
| Homicide and injury purposely inflicted by other persons                              | E960-969                           | X92-X99, Y00-Y09                   |
| Drugs, medicinal and biological substances causing adverse effects in therapeutic use | E930-E949                          | Y62-Y69, Y70-Y82, Y83-Y84          |

ICD, CM = International Classification of Diseases, Clinical Modification.

**Table S2.** All-cause standardized mortality ratio (SMR) of peritoneal dialysis (PD) stratified by gender.

| Causes of death                                           | Male     |          |       |                | Female   |          |       |                |
|-----------------------------------------------------------|----------|----------|-------|----------------|----------|----------|-------|----------------|
|                                                           | Observed | Expected | SMR   | 95%CI          | Observed | Expected | SMR   | 95%CI          |
| Total                                                     | 1865     | 295.82   | 6.30  | (6.02, 6.60)   | 1949     | 226.35   | 8.61  | (8.23, 9.00)   |
| Infectious and parasitic diseases                         | 121      | 9.18     | 13.18 | (10.94, 15.75) | 112      | 6.80     | 16.47 | (13.56, 19.82) |
| Neoplasms                                                 | 240      | 98.24    | 2.44  | (2.14, 2.77)   | 199      | 69.57    | 2.86  | (2.48, 3.29)   |
| Malignancy of digestive organs and peritoneum             | 108      | 42.01    | 2.57  | (2.11, 3.10)   | 60       | 24.85    | 2.41  | (1.84, 3.11)   |
| Malignancy of respiratory and intrathoracic organs        | 39       | 19.15    | 2.04  | (1.45, 2.78)   | 12       | 11.62    | 1.03  | (0.53, 1.80)   |
| Malignancy of bone, connective tissue, skin, and breast   | 4        | 1.07     | 3.75  | (1.01, 9.60)   | 26       | 8.18     | 3.18  | (2.07, 4.66)   |
| Malignancy of urinary organs                              | 33       | 3.17     | 10.40 | (7.16, 14.6)   | 54       | 2.50     | 21.59 | (16.22, 28.17) |
| Malignancy of lymphatic and hematopoietic tissue          | 14       | 4.21     | 3.33  | (1.82, 5.58)   | 11       | 3.35     | 3.28  | (1.63, 5.87)   |
| Other and unspecified sites                               | 42       | 15.4     | 2.73  | (1.97, 3.69)   | 36       | 9.12     | 3.95  | (2.77, 5.47)   |
| Endocrine, nutritional, metabolic, and immunity disorders | 419      | 17.28    | 24.25 | (21.98, 26.68) | 453      | 19.89    | 22.77 | (20.73, 24.97) |
| Diabetes mellitus                                         | 415      | 15.94    | 26.03 | (23.59, 28.66) | 443      | 18.66    | 23.74 | (21.58, 26.06) |
| Disorders of thyroid gland                                | 1        | 0.21     | 4.70  | (0.06, 26.15)  | 2        | 0.31     | 6.37  | (0.72, 23.01)  |
| Disorders of other endocrine glands                       | 3        | 1.12     | 2.67  | (0.54, 7.80)   | 8        | 0.91     | 8.74  | (3.76, 17.23)  |
| Blood and blood-forming organs                            | 9        | 0.72     | 12.50 | (5.70, 23.73)  | 6        | 0.75     | 7.99  | (2.92, 17.39)  |
| Mental disorders                                          | 5        | 2.01     | 2.49  | (0.80, 5.80)   | 4        | 1.84     | 2.17  | (0.59, 5.57)   |
| Nervous system and sense organs                           | 20       | 3.82     | 5.24  | (3.20, 8.09)   | 16       | 3.25     | 4.92  | (2.81, 7.99)   |

|                                                                                       |     |       |       |                 |     |       |       |                |
|---------------------------------------------------------------------------------------|-----|-------|-------|-----------------|-----|-------|-------|----------------|
| Circulatory system                                                                    | 565 | 64.04 | 8.82  | (8.11, 9.58)    | 428 | 52.14 | 8.21  | (7.45, 9.02)   |
| Hypertensive disease                                                                  | 97  | 7.32  | 13.25 | (10.75, 16.17)  | 94  | 7.75  | 12.13 | (9.80, 14.84)  |
| Ischemic heart disease                                                                | 233 | 18.09 | 12.88 | (11.28, 14.65)  | 153 | 12.16 | 12.58 | (10.67, 14.74) |
| Cerebrovascular disease                                                               | 116 | 21.55 | 5.38  | (4.45, 6.46)    | 78  | 17.32 | 4.50  | (3.56, 5.62)   |
| Other diseases of circulatory system                                                  | 119 | 17.08 | 6.97  | (5.77, 8.34)    | 103 | 14.92 | 6.91  | (5.64, 8.38)   |
| Respiratory system                                                                    | 156 | 33.91 | 4.60  | (3.91, 5.38)    | 146 | 20.87 | 7.00  | (5.91, 8.23)   |
| Pneumonia and influenza                                                               | 112 | 16.72 | 6.70  | (5.52, 8.06)    | 105 | 12.08 | 8.70  | (7.11, 10.53)  |
| Chronic obstructive pulmonary disease and allied conditions                           | 12  | 12.22 | 0.98  | (0.51, 1.72)    | 8   | 5.38  | 1.49  | (0.64, 2.93)   |
| Other diseases of respiratory system                                                  | 32  | 4.97  | 6.43  | (4.40, 9.08)    | 33  | 3.41  | 9.67  | (6.65, 13.58)  |
| Digestive system                                                                      | 228 | 19.94 | 11.44 | (10.00, 13.02)  | 239 | 12.67 | 18.87 | (16.55, 21.42) |
| Chronic liver disease and cirrhosis                                                   | 44  | 9.50  | 4.63  | (3.37, 6.22)    | 22  | 5.68  | 3.88  | (2.43, 5.87)   |
| Diseases of esophagus, stomach, and duodenum                                          | 8   | 1.36  | 5.88  | (2.53, 11.60)   | 7   | 0.96  | 7.28  | (2.92, 15.00)  |
| Noninfective enteritis and colitis                                                    | 2   | 0.21  | 9.51  | (1.07, 34.35)   | 3   | 0.23  | 13.22 | (2.66, 38.63)  |
| Other diseases of digestive system                                                    | 174 | 8.87  | 19.62 | (16.82, 22.77)  | 207 | 5.80  | 35.68 | (30.98, 40.88) |
| Genitourinary system                                                                  | 653 | 10.61 | 61.53 | (56.90, 66.43)  | 802 | 13.85 | 57.91 | (53.97, 62.06) |
| Nephritis, nephrotic syndrome, and nephrosis                                          | 634 | 7.57  | 83.80 | (77.40, 90.58)  | 775 | 8.82  | 87.92 | (81.83, 94.33) |
| Other diseases of urinary system                                                      | 15  | 2.82  | 5.33  | (2.98, 8.79)    | 27  | 4.96  | 5.44  | (3.58, 7.91)   |
| Disorders of genital organ                                                            | 4   | 0.23  | 17.24 | (4.64, 44.15)   | 0   | 0.07  |       |                |
| Skin and subcutaneous tissue                                                          | 13  | 0.94  | 13.83 | (7.36, 23.66)   | 17  | 1.02  | 16.6  | (9.66, 26.58)  |
| Musculoskeletal system and connective tissue                                          | 30  | 1.98  | 15.12 | (10.20, 21.58)  | 46  | 2.46  | 18.73 | (13.71, 24.98) |
| Congenital anomalies                                                                  | 2   | 0.12  | 17.01 | (1.91, 61.41)   | 4   | 0.13  | 29.94 | (8.06, 76.66)  |
| Symptoms, signs, and ill-defined conditions                                           | 37  | 10.88 | 3.40  | (2.39, 4.69)    | 29  | 9.35  | 3.10  | (2.08, 4.45)   |
| Accident                                                                              | 36  | 12.56 | 2.87  | (2.01, 3.97)    | 28  | 5.94  | 4.71  | (3.13, 6.81)   |
| Suicide and self-inflicted injury                                                     | 6   | 1.91  | 3.14  | (1.15, 6.83)    | 2   | 1.51  | 1.32  | (0.15, 4.77)   |
| Homicide and injury purposely inflicted by other persons                              | 1   | 0.25  | 4.05  | (0.05, 22.53)   | 0   | 0.11  | -     | -              |
| Drugs, medicinal and biological substances causing adverse effects in therapeutic use | 8   | 0.15  | 54.84 | (23.61, 108.05) | 4   | 0.14  | 29.52 | (7.94, 75.57)  |
| Other                                                                                 | 30  | 7.21  | 4.16  | (2.81, 5.94)    | 25  | 3.93  | 6.37  | (4.12, 9.4)    |

**Table S3.** All-cause standardized mortality ratio (SMR) of hemodialysis (HD) stratified by gender.

| Causes of death                                             | Male     |          |       |                | Female   |          |       |                |
|-------------------------------------------------------------|----------|----------|-------|----------------|----------|----------|-------|----------------|
|                                                             | Observed | Expected | SMR   | 95%CI          | Observed | Expected | SMR   | 95%CI          |
| Total                                                       | 36834    | 7758.39  | 4.75  | (4.70, 4.80)   | 34649    | 6177.47  | 5.61  | (5.55, 5.67)   |
| Infectious and parasitic diseases                           | 1357     | 256.70   | 5.29  | (5.01, 5.58)   | 1369     | 190.71   | 7.18  | (6.80, 7.57)   |
| Neoplasms                                                   | 4570     | 2315.09  | 1.97  | (1.92, 2.03)   | 3466     | 1528.38  | 2.27  | (2.19, 2.34)   |
| Malignancy of digestive organs and peritoneum               | 2237     | 828.93   | 2.70  | (2.59, 2.81)   | 1335     | 517.13   | 2.58  | (2.44, 2.72)   |
| Malignancy of respiratory and intrathoracic organs          | 601      | 424.35   | 1.42  | (1.31, 1.53)   | 309      | 224.82   | 1.37  | (1.23, 1.54)   |
| Malignancy of bone, connective tissue, skin, and breast     | 57       | 21.72    | 2.62  | (1.99, 3.40)   | 221      | 110.55   | 2.00  | (1.74, 2.28)   |
| Malignancy of urinary organs                                | 696      | 76.28    | 9.12  | (8.46, 9.83)   | 826      | 59.56    | 13.87 | (12.94, 14.85) |
| Malignancy of lymphatic and hematopoietic tissue            | 193      | 91.07    | 2.12  | (1.83, 2.44)   | 148      | 65.59    | 2.26  | (1.91, 2.65)   |
| Other and unspecified sites                                 | 786      | 284.27   | 2.76  | (2.58, 2.97)   | 627      | 150.24   | 4.17  | (3.85, 4.51)   |
| Endocrine, nutritional, metabolic, and immunity disorders   | 6560     | 461.00   | 14.23 | (13.89, 14.58) | 7152     | 580.05   | 12.33 | (12.05, 12.62) |
| Diabetes mellitus                                           | 6449     | 429.09   | 15.03 | (14.66, 15.40) | 7063     | 547.27   | 12.91 | (12.61, 13.21) |
| Disorders of thyroid gland                                  | 26       | 5.22     | 4.98  | (3.25, 7.30)   | 21       | 7.59     | 2.77  | (1.71, 4.23)   |
| Disorders of other endocrine glands                         | 85       | 26.69    | 3.18  | (2.54, 3.94)   | 68       | 25.20    | 2.70  | (2.10, 3.42)   |
| Blood and blood-forming organs                              | 56       | 19.84    | 2.82  | (2.13, 3.67)   | 73       | 20.75    | 3.52  | (2.76, 4.42)   |
| Mental disorders                                            | 28       | 55.76    | 0.50  | (0.33, 0.73)   | 23       | 65.25    | 0.35  | (0.22, 0.53)   |
| Nervous system and sense organs                             | 248      | 102.11   | 2.43  | (2.14, 2.75)   | 205      | 86.15    | 2.38  | (2.06, 2.73)   |
| Circulatory system                                          | 7597     | 1772.95  | 4.28  | (4.19, 4.38)   | 6427     | 1595.42  | 4.03  | (3.93, 4.13)   |
| Hypertensive disease                                        | 1170     | 205.49   | 5.69  | (5.37, 6.03)   | 1082     | 241.73   | 4.48  | (4.21, 4.75)   |
| Ischemic heart disease                                      | 2831     | 491.46   | 5.76  | (5.55, 5.98)   | 2113     | 366.01   | 5.77  | (5.53, 6.02)   |
| Cerebrovascular disease                                     | 1883     | 624.71   | 3.01  | (2.88, 3.15)   | 1651     | 537.06   | 3.07  | (2.93, 3.23)   |
| Other diseases of circulatory system                        | 1713     | 451.28   | 3.80  | (3.62, 3.98)   | 1581     | 450.62   | 3.51  | (3.34, 3.69)   |
| Respiratory system                                          | 2684     | 1151.01  | 2.33  | (2.24, 2.42)   | 1907     | 684.80   | 2.78  | (2.66, 2.91)   |
| Pneumonia and influenza                                     | 1836     | 560.45   | 3.28  | (3.13, 3.43)   | 1396     | 398.40   | 3.50  | (3.32, 3.69)   |
| Chronic obstructive pulmonary disease and allied conditions | 369      | 437.80   | 0.84  | (0.76, 0.93)   | 165      | 183.62   | 0.90  | (0.77, 1.05)   |
| Other diseases of respiratory system                        | 479      | 152.76   | 3.14  | (2.86, 3.43)   | 346      | 102.77   | 3.37  | (3.02, 3.74)   |
| Digestive system                                            | 2365     | 442.55   | 5.34  | (5.13, 5.56)   | 2182     | 347.24   | 6.28  | (6.02, 6.55)   |
| Chronic liver disease and cirrhosis                         | 911      | 183.47   | 4.97  | (4.65, 5.30)   | 581      | 140.52   | 4.13  | (3.81, 4.49)   |
| Diseases of esophagus, stomach, and duodenum                | 139      | 41.51    | 3.35  | (2.82, 3.95)   | 104      | 30.77    | 3.38  | (2.76, 4.10)   |
| Noninfective enteritis and colitis                          | 44       | 7.81     | 5.64  | (4.09, 7.57)   | 79       | 8.56     | 9.23  | (7.30, 11.50)  |
| Other diseases of digestive system                          | 1271     | 209.76   | 6.06  | (5.73, 6.40)   | 1418     | 167.39   | 8.47  | (8.04, 8.92)   |
| Genitourinary system                                        | 9383     | 328.42   | 28.57 | (27.99, 29.15) | 10359    | 425.80   | 24.33 | (23.86, 24.80) |
| Nephritis, nephrotic syndrome, and nephrosis                | 9163     | 227.09   | 40.35 | (39.53, 41.19) | 9952     | 261.68   | 38.03 | (37.29, 38.79) |
| Other diseases of urinary system                            | 199      | 93.06    | 2.14  | (1.85, 2.46)   | 390      | 162.40   | 2.40  | (2.17, 2.65)   |
| Disorders of genital organ                                  | 21       | 8.28     | 2.54  | (1.57, 3.88)   | 17       | 1.72     | 9.89  | (5.76, 15.84)  |

|                                                                                       |     |        |       |                |     |        |       |                |
|---------------------------------------------------------------------------------------|-----|--------|-------|----------------|-----|--------|-------|----------------|
| Skin and subcutaneous tissue                                                          | 203 | 29.16  | 6.96  | (6.04, 7.99)   | 212 | 33.72  | 6.29  | (5.47, 7.19)   |
| Musculoskeletal system and connective tissue                                          | 285 | 51.10  | 5.58  | (4.95, 6.26)   | 337 | 63.90  | 5.27  | (4.73, 5.87)   |
| Congenital anomalies                                                                  | 33  | 1.78   | 18.53 | (12.75, 26.02) | 34  | 1.93   | 17.65 | (12.22, 24.67) |
| Symptoms, signs, and ill-defined conditions                                           | 500 | 347.08 | 1.44  | (1.32, 1.57)   | 459 | 331.22 | 1.39  | (1.26, 1.52)   |
| Accident                                                                              | 706 | 253.64 | 2.78  | (2.58, 3.00)   | 413 | 122.38 | 3.37  | (3.06, 3.72)   |
| Suicide and self-inflicted injury                                                     | 138 | 46.07  | 3.00  | (2.52, 3.54)   | 71  | 27.49  | 2.58  | (2.02, 3.26)   |
| Homicide and injury purposely inflicted by other persons                              | 2   | 3.67   | 0.54  | (0.06, 1.97)   | 4   | 1.48   | 2.71  | (0.73, 6.94)   |
| Drugs, medicinal and biological substances causing adverse effects in therapeutic use | 83  | 2.85   | 29.15 | (23.22, 36.13) | 116 | 2.84   | 40.85 | (33.75, 48.99) |
| Other                                                                                 | 382 | 115.54 | 3.31  | (2.98, 3.65)   | 325 | 64.76  | 5.02  | (4.49, 5.60)   |

**Table S4.** All-cause standardized mortality ratio (SMR) of peritoneal dialysis (PD) stratified by age.

| Causes of death                                           | 18-49 y/o |       |        |                 | 50-64 y/o |        |       |                | ≥ 65 y/o |        |       |                |
|-----------------------------------------------------------|-----------|-------|--------|-----------------|-----------|--------|-------|----------------|----------|--------|-------|----------------|
|                                                           | Obs.      | Exp.  | SMR    | 95%CI           | Obs.      | Exp.   | SMR   | 95%CI          | Obs.     | Exp.   | SMR   | 95%CI          |
| Total                                                     | 407       | 31.49 | 12.93  | (11.70, 14.25)  | 1284      | 131.62 | 9.76  | (9.23, 10.30)  | 2123     | 359.06 | 5.91  | (5.66, 6.17)   |
| Infectious and parasitic diseases                         | 19        | 0.74  | 25.68  | (15.45, 40.11)  | 76        | 3.06   | 24.84 | (19.57, 31.09) | 138      | 12.18  | 11.33 | (9.52, 13.39)  |
| Neoplasms                                                 | 54        | 10.27 | 5.26   | (3.95, 6.86)    | 165       | 57.29  | 2.88  | (2.46, 3.35)   | 220      | 100.25 | 2.19  | (1.91, 2.50)   |
| Malignancy of digestive organs and peritoneum             | 15        | 3.44  | 4.36   | (2.44, 7.20)    | 71        | 22.75  | 3.12  | (2.44, 3.94)   | 82       | 40.68  | 2.02  | (1.60, 2.50)   |
| Malignancy of respiratory and intrathoracic organs        | 4         | 1.12  | 3.57   | (0.96, 9.14)    | 15        | 9.23   | 1.63  | (0.91, 2.68)   | 32       | 20.41  | 1.57  | (1.07, 2.21)   |
| Malignancy of bone, connective tissue, skin, and breast   | 7         | 1.10  | 6.36   | (2.55, 13.11)   | 12        | 4.58   | 2.62  | (1.35, 4.58)   | 11       | 3.57   | 3.08  | (1.54, 5.51)   |
| Malignancy of urinary organs                              | 12        | 0.12  | 99.51  | (51.36, 173.83) | 30        | 1.26   | 23.73 | (16.01, 33.87) | 45       | 4.29   | 10.49 | (7.65, 14.04)  |
| Malignancy of lymphatic and hematopoietic tissue          | 4         | 0.46  | 8.77   | (2.36, 22.46)   | 11        | 2.23   | 4.94  | (2.46, 8.83)   | 10       | 4.88   | 2.05  | (0.98, 3.77)   |
| Other and unspecified sites                               | 12        | 2.45  | 4.91   | (2.53, 8.57)    | 26        | 10.34  | 2.52  | (1.64, 3.69)   | 40       | 11.73  | 3.41  | (2.44, 4.64)   |
| Endocrine, nutritional, metabolic, and immunity disorders | 85        | 1.04  | 82.00  | (65.50, 101.40) | 353       | 7.91   | 44.61 | (40.08, 49.52) | 434      | 28.22  | 15.38 | (13.97, 16.90) |
| Diabetes mellitus                                         | 84        | 0.81  | 103.71 | (82.72, 128.40) | 348       | 7.27   | 47.9  | (42.99, 53.20) | 426      | 26.53  | 16.06 | (14.57, 17.66) |
| Disorders of thyroid gland                                | 1         | 0.06  | 17.38  | (0.23, 96.72)   | 0         | 0.14   | -     | -              | 2        | 0.33   | 6.03  | (0.68, 21.75)  |
| Disorders of other endocrine glands                       | 0         | 0.17  | -      | -               | 5         | 0.51   | 9.81  | (3.16, 22.90)  | 6        | 1.36   | 4.41  | (1.61, 9.60)   |
| Blood and blood-forming organs                            | 4         | 0.09  | 43.36  | (11.67, 111.01) | 6         | 0.31   | 19.49 | (7.12, 42.42)  | 5        | 1.07   | 4.67  | (1.50, 10.89)  |
| Mental disorders                                          | 0         | 0.36  | -      | -               | 1         | 0.71   | 1.42  | (0.02, 7.88)   | 8        | 2.79   | 2.87  | (1.24, 5.66)   |
| Nervous system and sense organs                           | 8         | 0.49  | 16.49  | (7.10, 32.49)   | 12        | 1.54   | 7.77  | (4.01, 13.58)  | 16       | 5.04   | 3.18  | (1.81, 5.16)   |
| Circulatory system                                        | 140       | 4.49  | 31.18  | (26.23, 36.79)  | 387       | 23.57  | 16.42 | (14.83, 18.14) | 466      | 88.12  | 5.29  | (4.82, 5.79)   |
| Hypertensive disease                                      | 35        | 0.36  | 97.17  | (67.67, 135.15) | 61        | 2.53   | 24.13 | (18.45, 30.99) | 95       | 12.18  | 7.80  | (6.31, 9.53)   |
| Ischemic heart disease                                    | 34        | 0.91  | 37.39  | (25.89, 52.26)  | 162       | 6.40   | 25.31 | (21.56, 29.52) | 190      | 22.94  | 8.28  | (7.15, 9.55)   |
| Cerebrovascular disease                                   | 37        | 1.44  | 25.66  | (18.07, 35.37)  | 84        | 7.72   | 10.88 | (8.68, 13.47)  | 73       | 29.71  | 2.46  | (1.93, 3.09)   |
| Other diseases of circulatory system                      | 34        | 1.78  | 19.12  | (13.24, 26.71)  | 80        | 6.92   | 11.56 | (9.17, 14.39)  | 108      | 23.30  | 4.64  | (3.80, 5.60)   |
| Respiratory system                                        | 28        | 0.92  | 30.37  | (20.18, 43.90)  | 79        | 5.99   | 13.18 | (10.44, 16.43) | 195      | 47.87  | 4.07  | (3.52, 4.69)   |
| Pneumonia and influenza                                   | 20        | 0.52  | 38.49  | (23.5, 59.45)   | 53        | 3.22   | 16.48 | (12.34, 21.55) | 144      | 25.06  | 5.75  | (4.85, 6.77)   |

|                                                                                       |     |      |        |                  |     |       |        |                  |     |       |       |                 |
|---------------------------------------------------------------------------------------|-----|------|--------|------------------|-----|-------|--------|------------------|-----|-------|-------|-----------------|
| Chronic obstructive pulmonary disease and allied conditions                           | 1   | 0.17 | 5.91   | (0.08, 32.86)    | 4   | 1.51  | 2.65   | (0.71, 6.79)     | 15  | 15.92 | 0.94  | (0.53, 1.55)    |
| Other diseases of respiratory system                                                  | 7   | 0.23 | 30.05  | (12.04, 61.91)   | 22  | 1.27  | 17.35  | (10.87, 26.27)   | 36  | 6.89  | 5.23  | (3.66, 7.24)    |
| Digestive system                                                                      | 59  | 3.62 | 16.30  | (12.41, 21.03)   | 167 | 10.08 | 16.57  | (14.15, 19.28)   | 241 | 18.90 | 12.75 | (11.19, 14.47)  |
| Chronic liver disease and cirrhosis                                                   | 12  | 1.98 | 6.08   | (3.14, 10.61)    | 23  | 5.82  | 3.95   | (2.50, 5.93)     | 31  | 7.38  | 4.20  | (2.85, 5.97)    |
| Diseases of esophagus, stomach, and duodenum                                          | 2   | 0.09 | 23.38  | (2.63, 84.42)    | 4   | 0.44  | 9.13   | (2.46, 23.37)    | 9   | 1.80  | 5.01  | (2.29, 9.51)    |
| Noninfective enteritis and colitis                                                    | 2   | 0.02 | 126.61 | (14.22, 457.12)  | 2   | 0.08  | 25.61  | (2.88, 92.47)    | 1   | 0.34  | 2.91  | (0.04, 16.21)   |
| Other diseases of digestive system                                                    | 43  | 1.54 | 27.88  | (20.18, 37.56)   | 138 | 3.74  | 36.90  | (31.00, 43.59)   | 200 | 9.39  | 21.31 | (18.46, 24.48)  |
| Genitourinary system                                                                  | 135 | 0.45 | 300.78 | (252.18, 356.01) | 486 | 3.83  | 126.75 | (115.73, 138.54) | 834 | 20.18 | 41.33 | (38.57, 44.23)  |
| Nephritis, nephrotic syndrome, and nephrosis                                          | 131 | 0.35 | 379.68 | (317.44, 450.54) | 474 | 3.01  | 157.24 | (143.40, 172.05) | 804 | 13.02 | 61.74 | (57.55, 66.16)  |
| Other diseases of urinary system                                                      | 3   | 0.09 | 31.81  | (6.39, 92.93)    | 10  | 0.78  | 12.86  | (6.16, 23.65)    | 29  | 6.91  | 4.20  | (2.81, 6.03)    |
| Disorders of genital organ                                                            | 1   | 0.01 | 105.45 | (1.38, 586.71)   | 2   | 0.04  | 47.48  | (5.33, 171.44)   | 1   | 0.25  | 3.99  | (0.05, 22.22)   |
| Skin and subcutaneous Tissue                                                          | 6   | 0.07 | 83.78  | (30.59, 182.37)  | 6   | 0.32  | 18.91  | (6.91, 41.16)    | 18  | 1.58  | 11.43 | (6.77, 18.06)   |
| Musculoskeletal system and connective tissue                                          | 36  | 0.29 | 124.90 | (87.47, 172.92)  | 24  | 1.05  | 22.79  | (14.60, 33.92)   | 16  | 3.10  | 5.16  | (2.95, 8.38)    |
| Congenital anomalies                                                                  | 0   | 0.06 | -      | -                | 1   | 0.11  | 9.34   | (0.12, 51.96)    | 5   | 0.08  | 62.67 | (20.20, 146.24) |
| Symptoms, signs, and ill-defined conditions                                           | 11  | 1.35 | 8.18   | (4.08, 14.63)    | 23  | 3.45  | 6.66   | (4.22, 10.00)    | 32  | 15.44 | 2.07  | (1.42, 2.93)    |
| Accident                                                                              | 12  | 3.45 | 3.48   | (1.80, 6.08)     | 28  | 6.59  | 4.25   | (2.82, 6.14)     | 24  | 8.46  | 2.84  | (1.82, 4.22)    |
| Suicide and self-inflicted injury                                                     | 2   | 0.98 | 2.05   | (0.23, 7.40)     | 5   | 1.39  | 3.61   | (1.16, 8.42)     | 1   | 1.06  | 0.94  | (0.01, 5.23)    |
| Homicide and injury purposely inflicted by other persons                              | 0   | 0.13 | -      | -                | 1   | 0.16  | 6.30   | (0.08, 35.03)    | 0   | 0.06  | -     | -               |
| Drugs, medicinal and biological substances causing adverse effects in therapeutic use | 1   | 0.02 | 51.02  | (0.67, 283.89)   | 6   | 0.09  | 68.56  | (25.04, 149.23)  | 5   | 0.17  | 28.69 | (9.25, 66.95)   |
| Other                                                                                 | 8   | 2.68 | 2.99   | (1.29, 5.88)     | 25  | 4.14  | 6.04   | (3.91, 8.92)     | 22  | 4.32  | 5.09  | (3.19, 7.71)    |

Table S5. All-cause standardized mortality ratio (SMR) of hemodialysis (HD) stratified by age.

| Causes of death                                           | 18-49 y/o |        |       |                 | 50-64 y/o |         |       |                | ≥ 65 y/o |          |       |                |
|-----------------------------------------------------------|-----------|--------|-------|-----------------|-----------|---------|-------|----------------|----------|----------|-------|----------------|
|                                                           | Obs.      | Exp.   | SMR   | 95%CI           | Obs.      | Exp.    | SMR   | 95%CI          | Obs.     | Exp.     | SMR   | 95%CI          |
| Total                                                     | 3138      | 221.37 | 14.18 | (13.68, 14.68)  | 16782     | 1597.85 | 10.50 | (10.34, 10.66) | 51563    | 12116.62 | 4.26  | (4.22, 4.29)   |
| Infectious and Parasitic Diseases                         | 94        | 4.85   | 19.39 | (15.67, 23.73)  | 560       | 34.80   | 16.09 | (14.79, 17.48) | 2072     | 407.76   | 5.08  | (4.86, 5.31)   |
| Neoplasms                                                 | 345       | 70.00  | 4.93  | (4.42, 5.48)    | 1976      | 677.26  | 2.92  | (2.79, 3.05)   | 5715     | 3096.21  | 1.85  | (1.80, 1.89)   |
| Malignancy of digestive organs and peritoneum             | 137       | 18.65  | 7.34  | (6.17, 8.68)    | 937       | 230.30  | 4.07  | (3.81, 4.34)   | 2498     | 1097.10  | 2.28  | (2.19, 2.37)   |
| Malignancy of respiratory and intrathoracic organs        | 28        | 5.59   | 5.01  | (3.33, 7.24)    | 187       | 90.24   | 2.07  | (1.79, 2.39)   | 695      | 553.34   | 1.26  | (1.16, 1.35)   |
| Malignancy of bone, connective tissue, skin, and breast   | 17        | 4.13   | 4.12  | (2.40, 6.59)    | 92        | 37.86   | 2.43  | (1.96, 2.98)   | 169      | 90.29    | 1.87  | (1.60, 2.18)   |
| Malignancy of urinary organs                              | 61        | 0.61   | 99.57 | (76.16, 127.91) | 302       | 12.56   | 24.05 | (21.41, 26.92) | 1159     | 122.67   | 9.45  | (8.91, 10.01)  |
| Malignancy of lymphatic and hematopoietic tissue          | 24        | 2.16   | 11.14 | (7.13, 16.57)   | 82        | 21.70   | 3.78  | (3.01, 4.69)   | 235      | 132.80   | 1.77  | (1.55, 2.01)   |
| Other and unspecified sites                               | 78        | 12.87  | 6.06  | (4.79, 7.57)    | 376       | 102.11  | 3.68  | (3.32, 4.07)   | 959      | 319.54   | 3.00  | (2.81, 3.20)   |
| Endocrine, nutritional, metabolic, and immunity disorders | 605       | 7.36   | 82.25 | (75.82, 89.07)  | 3984      | 100.99  | 39.45 | (38.23, 40.69) | 9123     | 932.71   | 9.78  | (9.58, 9.98)   |
| Diabetes mellitus                                         | 591       | 6.03   | 97.98 | (90.24, 106.21) | 3932      | 93.75   | 41.94 | (40.64, 43.27) | 8989     | 876.57   | 10.25 | (10.04, 10.47) |
| Disorders of thyroid gland                                | 2         | 0.31   | 6.55  | (0.74, 23.65)   | 7         | 1.53    | 4.58  | (1.84, 9.44)   | 38       | 10.97    | 3.46  | (2.45, 4.75)   |

|                                                                                       |     |       |        |                  |      |        |        |                  |       |         |       |                |
|---------------------------------------------------------------------------------------|-----|-------|--------|------------------|------|--------|--------|------------------|-------|---------|-------|----------------|
| Disorders of other endocrine glands                                                   | 12  | 1.02  | 11.78  | (6.08, 20.57)    | 45   | 5.71   | 7.89   | (5.75, 10.55)    | 96    | 45.17   | 2.13  | (1.72, 2.60)   |
| Blood and blood-forming organs                                                        | 8   | 0.54  | 14.71  | (6.33, 28.98)    | 32   | 3.55   | 9.00   | (6.16, 12.71)    | 89    | 36.49   | 2.44  | (1.96, 3.00)   |
| Mental disorders                                                                      | 1   | 2.38  | 0.42   | (0.01, 2.34)     | 6    | 8.16   | 0.73   | (0.27, 1.60)     | 44    | 110.46  | 0.40  | (0.29, 0.53)   |
| Nervous system and sense organs                                                       | 41  | 3.06  | 13.41  | (9.63, 18.20)    | 120  | 17.76  | 6.76   | (5.60, 8.08)     | 292   | 167.44  | 1.74  | (1.55, 1.96)   |
| Circulatory system                                                                    | 681 | 31.16 | 21.85  | (20.24, 23.56)   | 3528 | 288.01 | 12.25  | (11.85, 12.66)   | 9815  | 3049.19 | 3.22  | (3.16, 3.28)   |
| Hypertensive disease                                                                  | 94  | 2.17  | 43.29  | (34.98, 52.98)   | 495  | 27.85  | 17.77  | (16.24, 19.41)   | 1663  | 417.20  | 3.99  | (3.80, 4.18)   |
| Ischemic heart disease                                                                | 158 | 6.47  | 24.41  | (20.75, 28.53)   | 1243 | 77.98  | 15.94  | (15.07, 16.85)   | 3543  | 773.02  | 4.58  | (4.43, 4.74)   |
| Cerebrovascular disease                                                               | 268 | 10.89 | 24.60  | (21.74, 27.73)   | 1084 | 101.29 | 10.70  | (10.07, 11.36)   | 2182  | 1049.59 | 2.08  | (1.99, 2.17)   |
| Other diseases of circulatory system                                                  | 161 | 11.62 | 13.85  | (11.79, 16.17)   | 706  | 80.89  | 8.73   | (8.10, 9.40)     | 2427  | 809.39  | 3.00  | (2.88, 3.12)   |
| Respiratory system                                                                    | 94  | 6.28  | 14.96  | (12.09, 18.30)   | 639  | 71.24  | 8.97   | (8.29, 9.69)     | 3858  | 1758.29 | 2.19  | (2.13, 2.26)   |
| Pneumonia and influenza                                                               | 60  | 3.44  | 17.42  | (13.29, 22.42)   | 440  | 36.90  | 11.92  | (10.84, 13.09)   | 2732  | 918.51  | 2.97  | (2.86, 3.09)   |
| Chronic obstructive pulmonary disease and allied conditions                           | 6   | 1.27  | 4.71   | (1.72, 10.25)    | 42   | 19.40  | 2.17   | (1.56, 2.93)     | 486   | 600.75  | 0.81  | (0.74, 0.88)   |
| Other diseases of respiratory system                                                  | 28  | 1.57  | 17.89  | (11.89, 25.86)   | 157  | 14.95  | 10.50  | (8.92, 12.28)    | 640   | 239.02  | 2.68  | (2.47, 2.89)   |
| Digestive system                                                                      | 251 | 28.03 | 8.95   | (7.88, 10.13)    | 1137 | 129.46 | 8.78   | (8.28, 9.31)     | 3159  | 632.29  | 5.00  | (4.82, 5.17)   |
| Chronic liver disease and cirrhosis                                                   | 120 | 17.07 | 7.03   | (5.83, 8.41)     | 495  | 78.46  | 6.31   | (5.77, 6.89)     | 877   | 228.46  | 3.84  | (3.59, 4.10)   |
| Diseases of esophagus, stomach, and duodenum                                          | 9   | 0.68  | 13.33  | (6.08, 25.31)    | 53   | 5.86   | 9.05   | (6.78, 11.84)    | 181   | 65.75   | 2.75  | (2.37, 3.18)   |
| Noninfective enteritis and colitis                                                    | 2   | 0.12  | 17.00  | (1.91, 61.37)    | 27   | 1.17   | 23.08  | (15.21, 33.58)   | 94    | 15.08   | 6.23  | (5.04, 7.63)   |
| Other diseases of digestive system                                                    | 120 | 10.17 | 11.80  | (9.78, 14.11)    | 562  | 43.98  | 12.78  | (11.74, 13.88)   | 2007  | 323.00  | 6.21  | (5.94, 6.49)   |
| Genitourinary system                                                                  | 832 | 3.15  | 264.15 | (246.5, 282.72)  | 3943 | 46.41  | 84.96  | (82.33, 87.65)   | 14967 | 704.66  | 21.24 | (20.90, 21.58) |
| Nephritis, nephrotic syndrome, and nephrosis                                          | 813 | 2.50  | 325.55 | (303.56, 348.72) | 3849 | 37.12  | 103.69 | (100.44, 107.02) | 14453 | 449.15  | 32.18 | (31.66, 32.71) |
| Other diseases of urinary system                                                      | 18  | 0.59  | 30.37  | (17.99, 48.01)   | 81   | 8.79   | 9.22   | (7.32, 11.46)    | 490   | 246.08  | 1.99  | (1.82, 2.18)   |
| Disorders of genital organ                                                            | 1   | 0.06  | 16.70  | (0.22, 92.90)    | 13   | 0.50   | 25.77  | (13.71, 44.06)   | 24    | 9.43    | 2.54  | (1.63, 3.79)   |
| Skin and subcutaneous tissue                                                          | 33  | 0.66  | 50.12  | (34.49, 70.38)   | 96   | 4.17   | 23.01  | (18.64, 28.10)   | 286   | 58.04   | 4.93  | (4.37, 5.53)   |
| Musculoskeletal system and connective tissue                                          | 101 | 1.54  | 65.43  | (53.29, 79.5)    | 173  | 11.25  | 15.38  | (13.17, 17.85)   | 348   | 102.20  | 3.41  | (3.06, 3.78)   |
| Congenital anomalies                                                                  | 5   | 0.37  | 13.55  | (4.37, 31.61)    | 31   | 1.11   | 27.86  | (18.92, 39.54)   | 31    | 2.23    | 13.93 | (9.46, 19.77)  |
| Symptoms, signs, and ill-defined conditions                                           | 59  | 11.16 | 5.29   | (4.02, 6.82)     | 213  | 47.09  | 4.52   | (3.94, 5.17)     | 687   | 620.05  | 1.11  | (1.03, 1.19)   |
| Accident                                                                              | 96  | 25.75 | 3.73   | (3.02, 4.55)     | 377  | 86.24  | 4.37   | (3.94, 4.84)     | 646   | 264.03  | 2.45  | (2.26, 2.64)   |
| Suicide and self-inflicted injury                                                     | 32  | 9.44  | 3.39   | (2.32, 4.79)     | 96   | 23.35  | 4.11   | (3.33, 5.02)     | 81    | 40.77   | 1.99  | (1.58, 2.47)   |
| Homicide and injury purposely inflicted by other persons                              | 0   | 1.04  | -      | -                | 2    | 2.07   | 0.97   | (0.11, 3.49)     | 4     | 2.04    | 1.96  | (0.53, 5.03)   |
| Drugs, medicinal and biological substances causing adverse effects in therapeutic use | 14  | 0.10  | 139.26 | (76.07, 233.66)  | 47   | 0.87   | 54.32  | (39.91, 72.24)   | 138   | 4.72    | 29.23 | (24.55, 34.53) |
| Other                                                                                 | 34  | 14.48 | 2.35   | (1.63, 3.28)     | 187  | 43.69  | 4.28   | (3.69, 4.94)     | 486   | 122.13  | 3.98  | (3.63, 4.35)   |
